# Supplementary material for: PTX3 modulates the immunoflogosis in tumor microenvironment and is a prognostic factor for patients with clear cell renal cell carcinoma
Source: publisher site journal article supplement (doi:10.18632/aging.103169), 2020-04-28
Supplement: Supplementary file [file aging-v12i8-103169-supplementary-material-SD1.pdf]

## SUPPLEMENTARY FIGURE

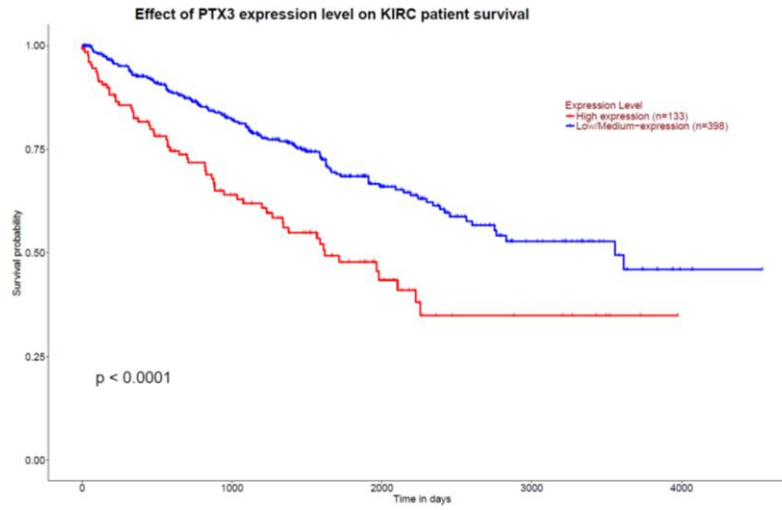

**Supplementary Figure 1. Kaplan-Meier survival curves, stratified by the expression level (FPKM) of PTX3 in the tumor tissue at the time of diagnosis.** Data from the cancer genome atlas (TCGA) clear cell renal cell carcinoma patient cohort (KIRC).
