# Supplementary material for: PTX3 modulates the immunoflogosis in tumor microenvironment and is a prognostic factor for patients with clear cell renal cell carcinoma
Source: publisher site journal article supplement (doi:10.18632/aging.103169), 2020-04-28
Supplement: Supplementary file [file aging-v12i8-103169-supplementary-material-SD2.pdf]

## SUPPLEMENTARY TABLE

**Supplementary Table 1. Clinical and pathological characteristics of patients with renal clear cell carcinoma subjected to PTX3 tissue expression analysis.**

| <b>Clinical characteristics of RCC patients</b>       |        |            |
|-------------------------------------------------------|--------|------------|
| Patients, n                                           |        | 30         |
| Age, n                                                |        | 59.1±11.1  |
| Female Gender, n (%)                                  |        | 13 (43.3%) |
| Diabetes Mellitus, n (%)                              |        | 11 (36.7%) |
| C reactive protein (CRP), mg/dL                       |        | 4.5±1.5    |
| CKD-EPI eGFR, ml/min/1.73 m <sup>2</sup>              |        | 94.5±10.5  |
| <b>Histologic characterization of of RCC patients</b> |        |            |
| Furhman Grading                                       | G 1    | 5 (16.7%)  |
|                                                       | G 2    | 18 (60.0%) |
|                                                       | G 3    | 4 (13.3%)  |
|                                                       | G 4    | 3 (10.0%)  |
| TNM/AJCC Staging                                      | pT1a   | 5 (16.7%)  |
|                                                       | pT1b   | 13 (43.3%) |
|                                                       | pT2a   | 5 (10.0%)  |
|                                                       | pT2b   | 3 (10.0%)  |
|                                                       | pT3a   | 4 (13.3%)  |
|                                                       | pT3b-c | 0 (0.0%)   |
|                                                       | pT4    | 0 (0.0%)   |

Abbreviations: CKD-EPI, Chronic Kidney Disease EPIdemiology Collaboration; eGFR, estimated Glomerular Filtration Rate; TNM/AJCC: Tumor size, Lymph Nodes affected, Metastases/American Joint Committee on Cancer.

Values are expressed as mean ± standard deviation, or number of cases and (percentage).
